# Supplementary material for: Residents manage dynamic plant communities: Change over time in urban vegetation
Source: Frontiers journal article supplement (doi:10.3389/fevo.2022.944803), 2022-12-15
Supplement: Image_2.PDF [file Image_2.PDF]

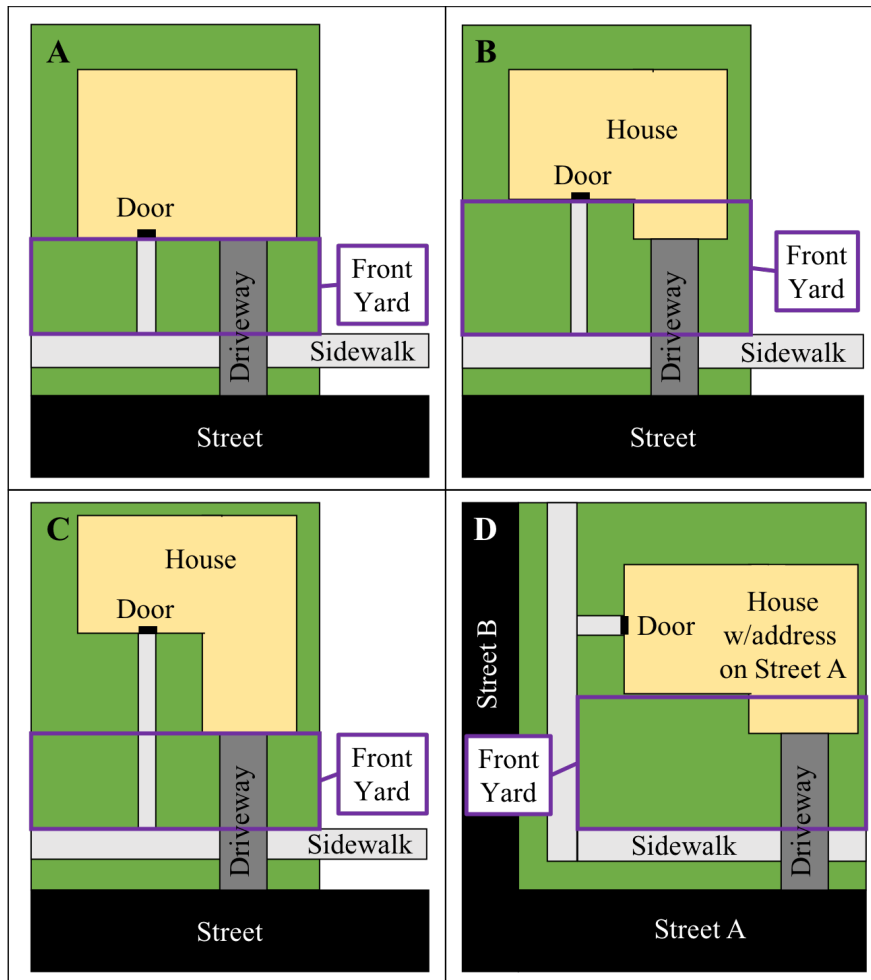

Figure S2. Definition of front yards for different lot configurations. (A) The front yard was defined as the area between the sidewalk and the front of the house, not including the strip between the sidewalk and street where it existed. (B) If the house was partially set back, the front yard was defined as ending at the front door. (C) If the front door was more than half the length of the driveway back from the furthest front part of the house, then the front yard was defined as ending at the frontmost part of the house. (D) For corner lots, the front yard was the area facing the street matching the house address.
